# Supplementary material for: Systematic discovery of mutation-specific synthetic lethals by mining pan-cancer human primary tumor data
Source: PubMed Central journal article supplement (PMC5460027; doi:10.1038/ncomms15580), 2017-05-31
Supplement: ncomms15580-s1.pdf [file ncomms15580-s1.pdf]

**a**

| Cancer Type            | # Samples with Mutation & Copy Number | # Samples with Mutation & Expression |
|------------------------|---------------------------------------|--------------------------------------|
| Acute Myeloid Leukemia | -                                     | 181                                  |
| Bladder                | 99                                    | 38                                   |
| Breast                 | 746                                   | 698                                  |
| Colorectal             | 144                                   | 137                                  |
| Glioblastoma           | 122                                   | 109                                  |
| Head & Neck            | 291                                   | 248                                  |
| Lower Grade Glioma     | 208                                   | 205                                  |
| Lung Adeno             | 450                                   | 121                                  |
| Lung Squam             | 157                                   | 157                                  |
| Renal                  | 388                                   | 354                                  |
| Ovarian                | 308                                   | 261                                  |
| Uterine                | 157                                   | 220                                  |

**b**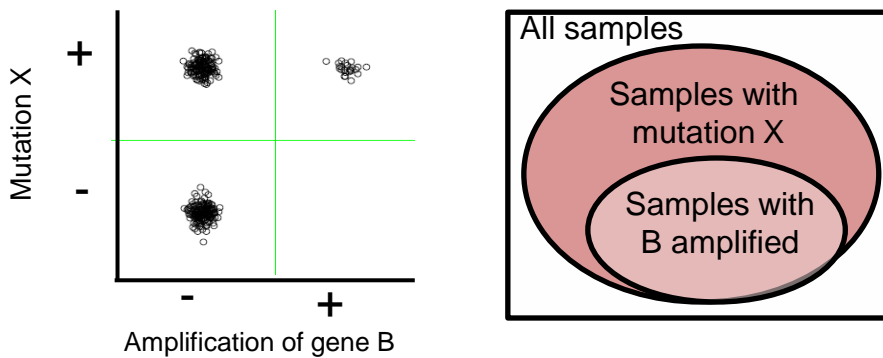**c**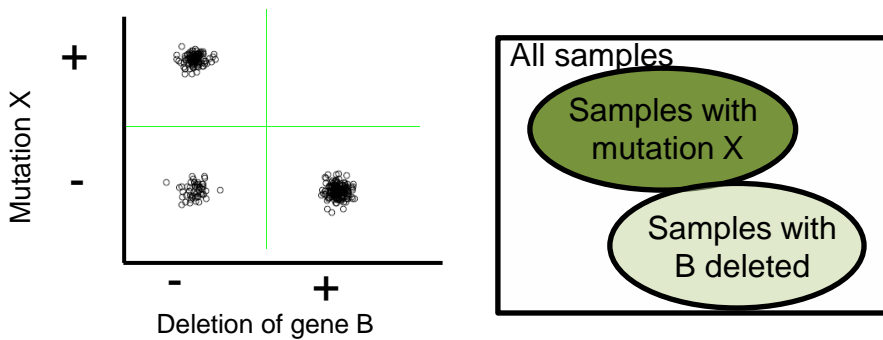

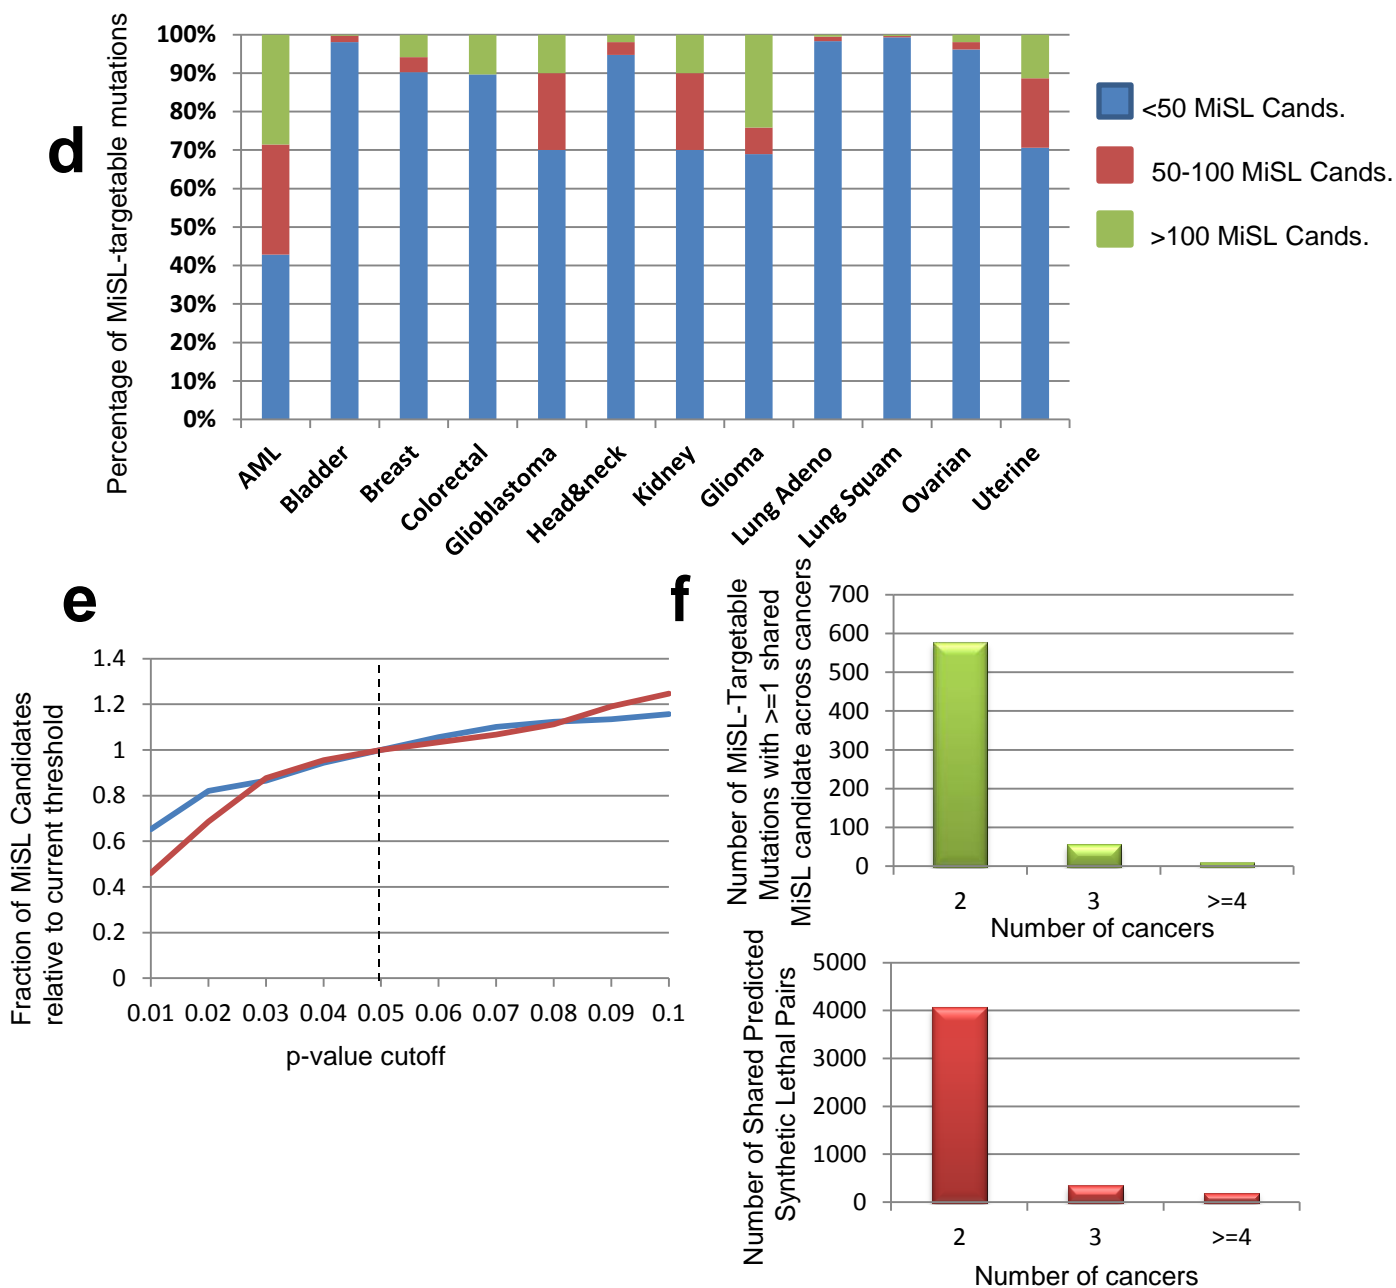

**Supplementary Figure 1. Primary Tumor Samples and Cancer Types Used in MiSL.**

(a) Summary of Samples in 12 TCGA Cancers Analyzed. (b) HI-HI Boolean implication (if amplification B is present, then mutation X is present) represents a subset relationship between the two attributes. (c) HI-LO Boolean implication (if deletion B is present, then mutation X is NOT present) represents a mutual exclusion relationship between the two attributes. (d) Distribution of number of MiSL candidates for each MiSL-targetable mutation in each cancer type. (e) Sensitivity analysis by varying the p-value threshold for differential expression for copy number filter (blue) and expression filter (red) in MiSL pipeline (dashed line shows current threshold). (f) Distribution of shared synthetic lethal predictions across different cancers. The green barplot shown the number of MiSL-targetable mutations that have at least one common MiSL candidate in different number of cancers. The red barplot shows the number of synthetic lethal interactions (i.e., a {mutation, MiSL candidate} pair) that are common across different numbers of cancers.

**a**

| Cancer       | # of Evaluable Mutations | Evaluable Mutation             |
|--------------|--------------------------|--------------------------------|
| Breast       | 2                        | MAP3K1, PIK3CA                 |
| Colorectal   | 5                        | APC, CSMD3, KRAS, PIK3CA, TP53 |
| Glioblastoma | 1                        | PTEN                           |
| Kidney       | 0                        | -                              |
| Leukemia     | 1                        | TP53                           |
| Lung Squam   | 0                        | -                              |
| Ovarian      | 0                        | -                              |

**b**

| Mutation | p-value | NES  |
|----------|---------|------|
| APC      | 0.003   | 1.55 |
| CSMD3    | > 0.1   | -    |
| KRAS     | 0.04    | 1.48 |
| PIK3CA   | 0.03    | 1.35 |
| TP53     | >0.1    | -    |
| APC&KRAS | 0.07    | 1.35 |

**c**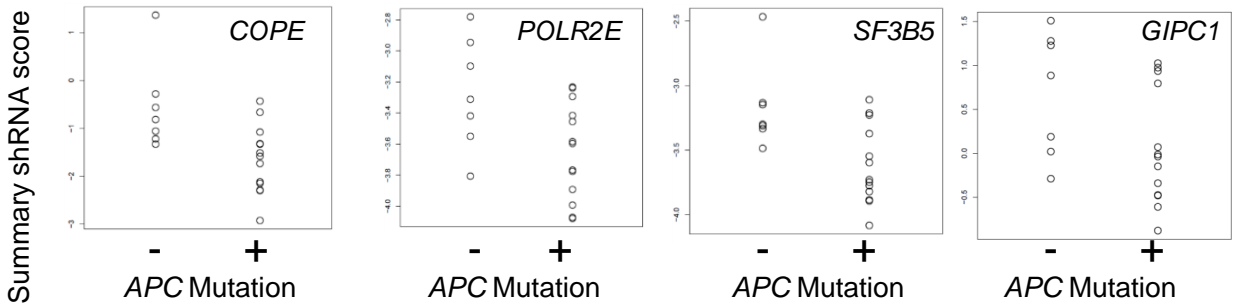**d**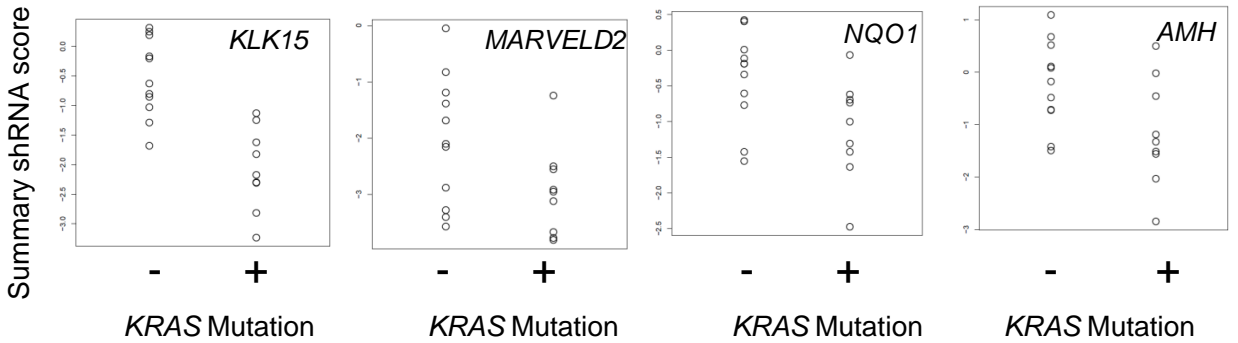**e**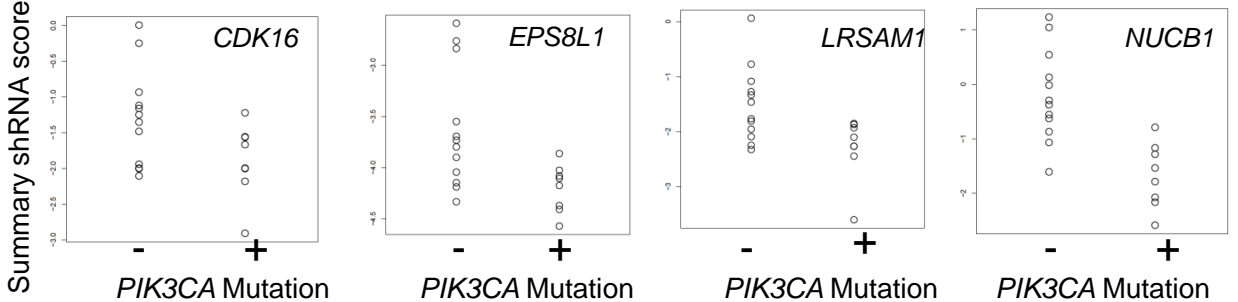

f

|                     | shRNA |        |
|---------------------|-------|--------|
|                     | Hits  | Non-SL |
| MiSL Candidates     | 9     | 52     |
| Not MiSL Candidates | 430   | 7688   |

p-value = 0.004

g

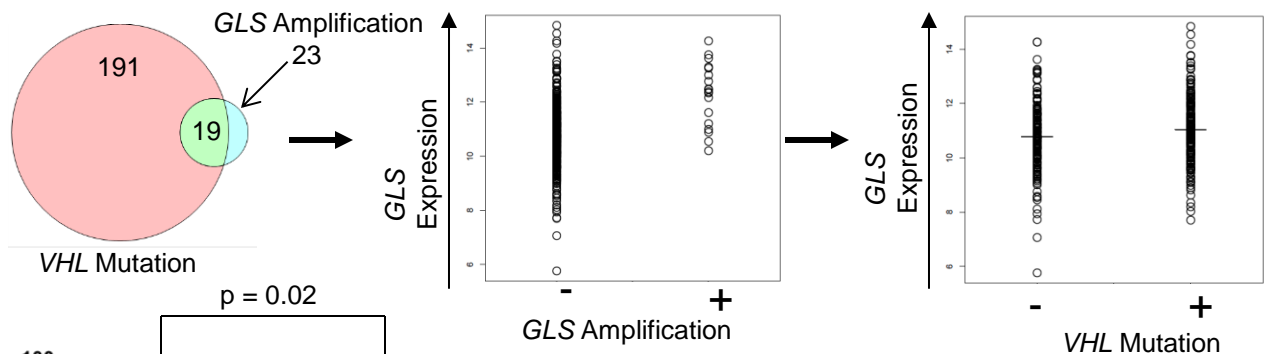

h

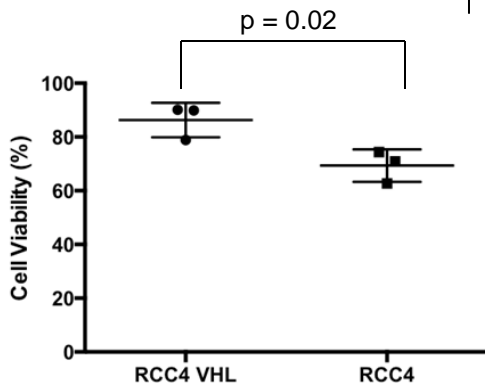

**Supplementary Figure 2. Validation of MiSL.** (a) Summary of Evaluable Mutations in Project Achilles for different cancers. (b) Summary of gene set enrichment analyses (normalized enrichment score and p-value) comparing enrichment of MiSL candidates in Achilles data for mutations in colorectal cancer. (c) Achilles shRNA summary scores for representative shRNAs in colorectal cell lines with *APC* mutation versus wild-type cell lines for 4 different MiSL candidates for *APC* mutation in colorectal cancer. (d) Achilles shRNA summary scores for representative shRNAs in colorectal cell lines with *KRAS* mutation versus wild-type cell lines for 4 different MiSL candidates for *KRAS* mutation in colorectal cancer. (e) Achilles shRNA summary scores for representative shRNAs in colorectal cell lines with *PIK3CA* mutation versus wild-type cell lines for 4 different MiSL candidates for *PIK3CA* mutation in colorectal cancer. (f) Contingency table showing overlap between MiSL candidates for *IDH1* mutation in acute myeloid leukemia and shRNA synthetic lethals as per DECIPHER screen with a more stringent criterion (drop-out ratio of 0.6 instead of 0.8 for 2 or more shRNAs) for calling synthetic lethals in shRNA data. The overlap is statistically significant with the more stringent criterion for calling synthetic lethals. (g) MiSL analysis steps illustrated for *VHL* Mutation and *GLS* – (i) subset relationship between *GLS* gene amplification and *VHL* mutation (HI-HI Boolean implication), (ii) amplification of *GLS* is concordant with higher expression of the gene ( $p < 0.05$ ), (iii) expression of *GLS* is higher in *VHL*-mutated kidney cancer ( $p < 0.05$ ). (h) Cell viability of RCC4 and RCC4/VHL after siRNA treatment to *GLS*. All error bars represent the SEM ( $n = 3$ ) ( $p = 0.024$ ).

**a**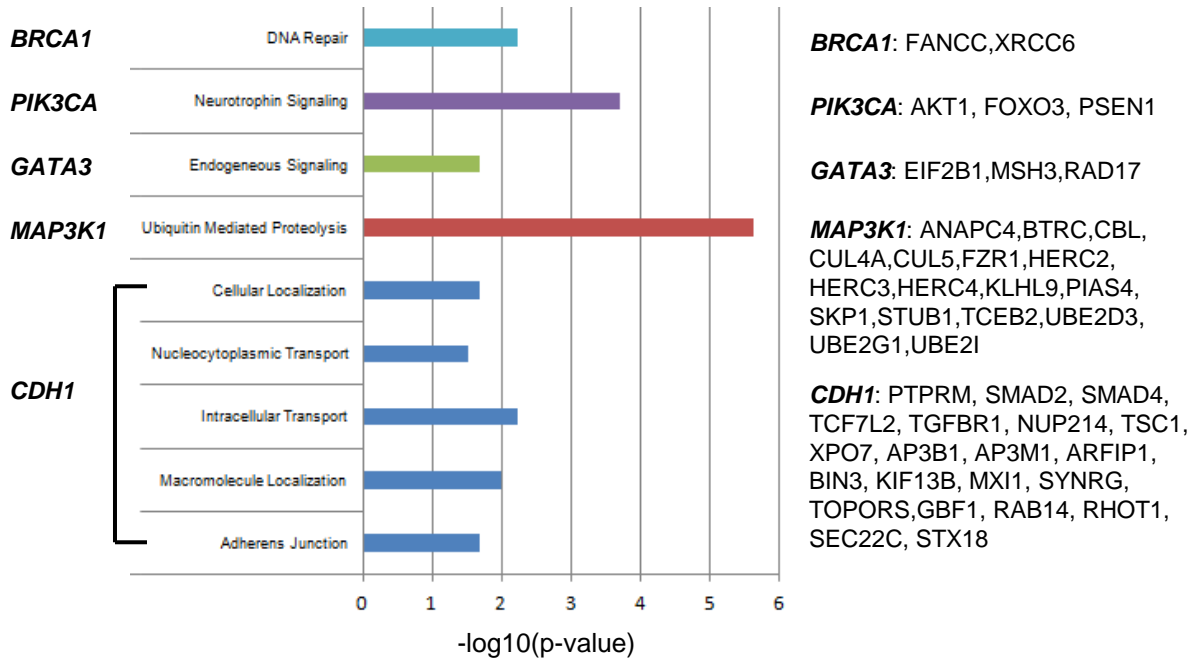**b**

| Cancer Type        | # of MiSL candidates | # of Recurrent MiSL Candidates |
|--------------------|----------------------|--------------------------------|
| AML                | 601                  | 21                             |
| Bladder            | 1842                 | 0                              |
| Breast             | 1758                 | 56                             |
| Colorectal         | 1321                 | 33                             |
| Glioblastoma       | 335                  | 10                             |
| Head & Neck        | 1924                 | 4                              |
| Kidney             | 299                  | 16                             |
| Lower grade glioma | 1794                 | 420                            |
| Lung adeno         | 2772                 | 0                              |
| Lung squam         | 2425                 | 0                              |
| Ovarian            | 534                  | 20                             |
| Uterine            | 4481                 | 225                            |

**Supplementary Figure 3. Pathway Analysis of MiSL Candidates for Recurrent Mutations and Recurrent MiSL Candidates.** (a) Same pathway enrichment analyses using GO and KEGG gene sets for MiSL-targetable mutations in breast cancer. The x-axis shows the negative log of p-value of Fisher’s exact test. MiSL candidates are said to be enriched in the same pathway as the mutated gene if (i) the MiSL candidates of the mutation are enriched for a pathway where overlap is measured using Fisher’s exact test (ii) the mutation belongs to the same pathway. Only statistically significant results ( $p < 0.05$ ) are reported. (b) Recurrent MiSL Candidates in the Different TCGA Cancers. A MiSL candidate is called recurrent in a cancer if it appears as a MiSL candidate for more than 5% of the recurrent mutations in the cancer.

**a**

*BCL2L2*: ABT199, ABT737  
*PI4KA*: Wortmannin  
*ACACA*: TOFA  
*CSNK1E*: IC261  
*NLK*: SB203580  
*ZNF395*: Digoxigenin  
*PPP2R2A, PPP2R2D*: Cantharidin  
*KDM6B*: GSK-J4  
*SUZ12/SUZ12P*: GSK-126  
*TNKS*: G007-LK  
*MLL*: MM-102  
*THRA*: SKI-606  
*MAPK8*: JNK-IN-8  
*PPP2R2A, PPP2R2D*: LB100  
*ZNF248*: Proscardillin  
*CLPX*: Vorinostat

**b**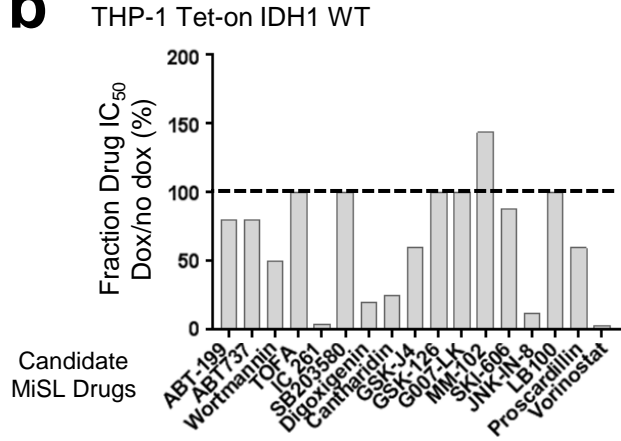

**Supplementary Figure 4. Drug Screen for MiSL candidates of IDH1 mutation in AML.** (a) List of druggable MiSL candidates for the IDH1 mutation in AML. (b) Fraction IC<sub>50</sub> for each drug tested in inducible IDH1 wildtype cells comparing (+ dox) to (- dox) as a control. (c) Table showing clinical characteristics of *IDH1* mutant AML patient samples. (d) *ACACA* expression in sorted *IDH1* mutant blasts (n=8) and IDH1 wildtype blasts (n=5) from AML patients compared to normal CD34+ cord blood determined by Taqman expression assay. Bars=SD of 4 replicates. (e) *ACACA* mRNA expression for 3 different shRNAs designed to target *ACACA* determined by real-time quantitative PCR in triplicate after transduction of THP-1 cells with shRNA lentivirus expressed in pRSI9 virus. shRNA #3 showed minimal knockdown. Error bars represent standard deviations, \* p < 0.05, unpaired t-test. ns = non-significant. (f) Viable cell growth of THP-1 pTRIPZ IDH1 R132H-T2A-GFP in 0.5% serum transduced with shRNA #3 showing minimal defect in presence of IDH1 mutation (+dox). (g) Cell growth of parental THP-1 cells treated with 1 µg/ml doxycycline in 0.5% and 10% serum. (h) In-del mutation frequency reported by TIDE from genomic DNA extracted from IDH1 wildtype and R132H inducible THP-1 cells transduced with pLENTICRISPR v2 encoding guide RNA targeting exon 4 of *ACACA*. This guide was selected out of four gRNA sequences that were designed and tested in K562 cells. (i) Sequencing of *ACACA* exon 4 showing disruption of *ACACA* gene in both IDH1 wildtype and R132H THP-1 cell pools. (j) Cell sorting strategy after lentiviral CRISPR transduction showing RFP+ THP-1 cells marked lentiCRISPR integration and doxycycline-inducible GFP-T2A-IDH1 wildtype and R132H. (k) Western blot showing reduced *ACACA* protein expression after CRISPR cutting in pooled cells compared to untransduced IDH1 WT or R132H inducible THP-1 cells respectively. (l) Sequencing of Exon 4 of *ACACA* from the single cell-derived THP-1 clones showing in/dels. (m) Flow cytometry showing engraftment of RFP+, CD33+ AML blasts in NSG mice, gated on engrafted CD45+ cells non-targeting shRNA vs *ACACA* shRNA #1.

**c**

| AML No. | Age | Sex | Primary / Secondary | Cytogenetics  | IDH1  | Other mutations         |
|---------|-----|-----|---------------------|---------------|-------|-------------------------|
| SU430   | 46  | M   | Primary             | Der(7)t(7;11) | R132C | -                       |
| SU291.F | 37  | F   | Primary             | +8            | R132H | FLT3-TKD, NPM1c+        |
| SU277C  | 70  | F   | Primary             | NK            | R132G |                         |
| SU372   | 53  | F   | Primary             | NK            | R132H | FLT3-ITD                |
| SU654   | 47  | M   | Primary             | NK            | R132C | NPM1c+                  |
| SU676   | 62  | M   | Primary             | NK            | R132H | NPM1c+, N-RAS, DNMT3A   |
| SU582   | 71  | F   | Primary             | NK            | R132H | FLT3-ITD, N-RAS, NPM1c+ |
| SU694   | 80  | M   | Secondary           | +8            | R132H | N-RAS                   |
| SU839   | 62  | M   | Primary             | NK            | R132H | FLT3-TKD                |
| SU366   | 75  | M   | Secondary, MDS      | NK            | R132C |                         |
| SU223   | 18  | F   | Primary, Relapsed   | t(9;11)       | WT    | MLL rearrangment        |
| SU353   | 65  | M   | Primary             | NK            | WT    | FLT3-ITD, NPM1c+        |
| SU354   | 65  | M   | Primary, relapsed   | +19           | WT    |                         |
| SU463   | 56  | F   | Primary             | Complex       | WT    | K-RAS                   |
| SU674   | 51  | F   | Primary             | NK            | WT    | DMNT3A R882H            |

**d**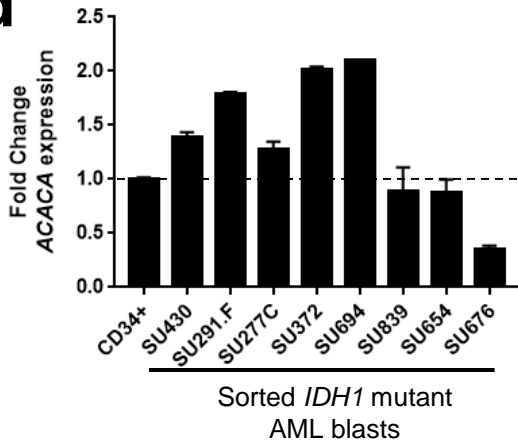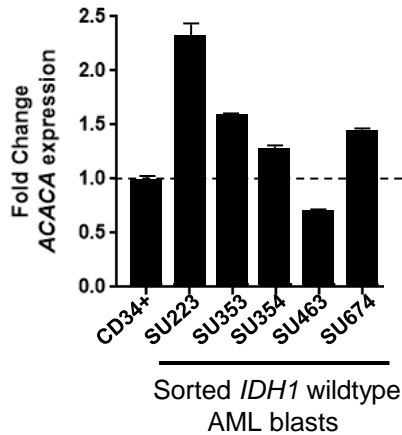

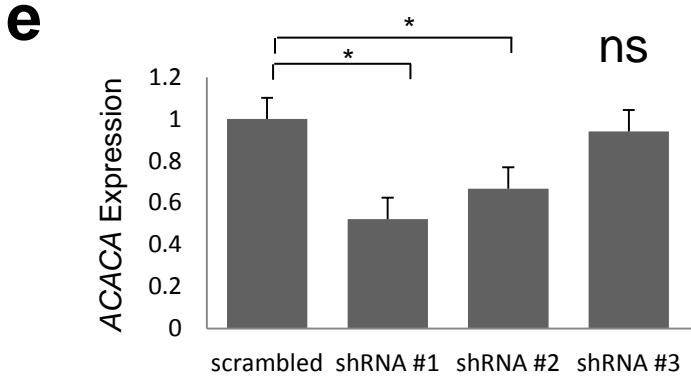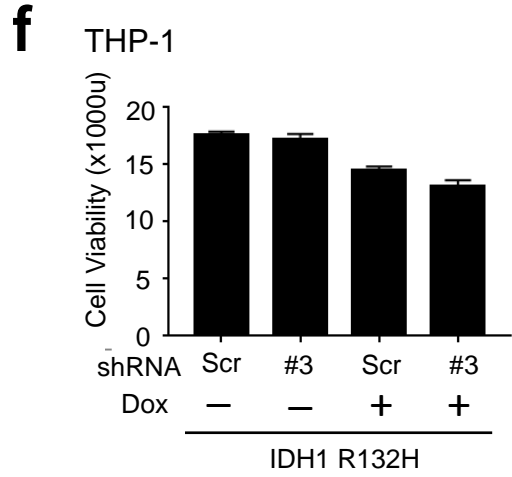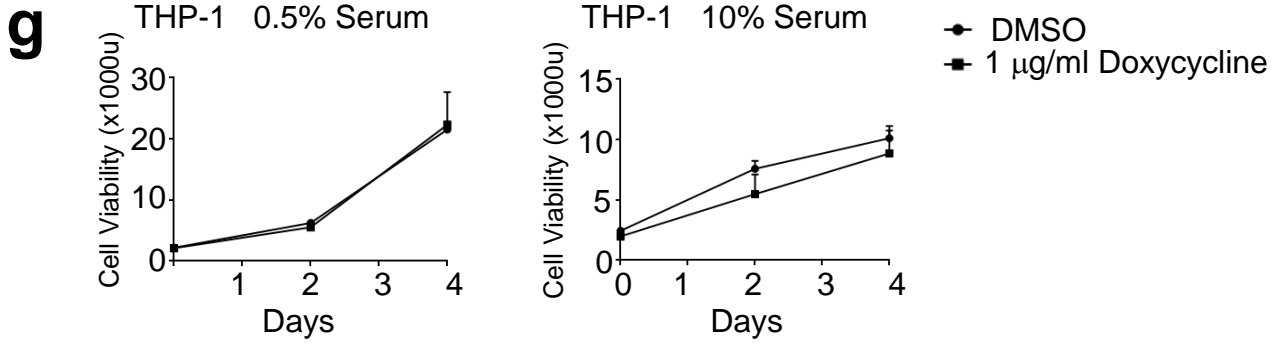







**a**

Panobinostat

*HDAC1, HDAC2, HDAC3, HDAC4, HDAC5, HDAC6, HDAC7, HDAC8, HDAC9, HDAC10, HDAC11, SIRT1, SIRT2, SIRT3, SIRT4, SIRT5, SIRT6, SIRT7*

AZD6244, PD-0325901

*MAP2K1, MAP2K2, MAP2K3, MAP2K4, MAP2K5, MAP2K6, MAP2K7*

**b**

| Target | Drug                          | Evaluable                    | p-value    |
|--------|-------------------------------|------------------------------|------------|
| HDAC   | Panobinostat                  | Yes                          | 0.004      |
| MEK    | AZD6244, PD-0325901           | Yes                          | 0.01       |
| RTK    | Sorafenib                     | Yes                          | 0.09       |
| CDK4   | PD-0332991                    | No, very few sensitive lines | -          |
| RAF    | PLX4720, RAF265               | Yes                          | NS (> 0.1) |
| EGFR   | Erlotinib, Lapatinib, ZD-6474 | Yes                          | NS (> 0.1) |

**c**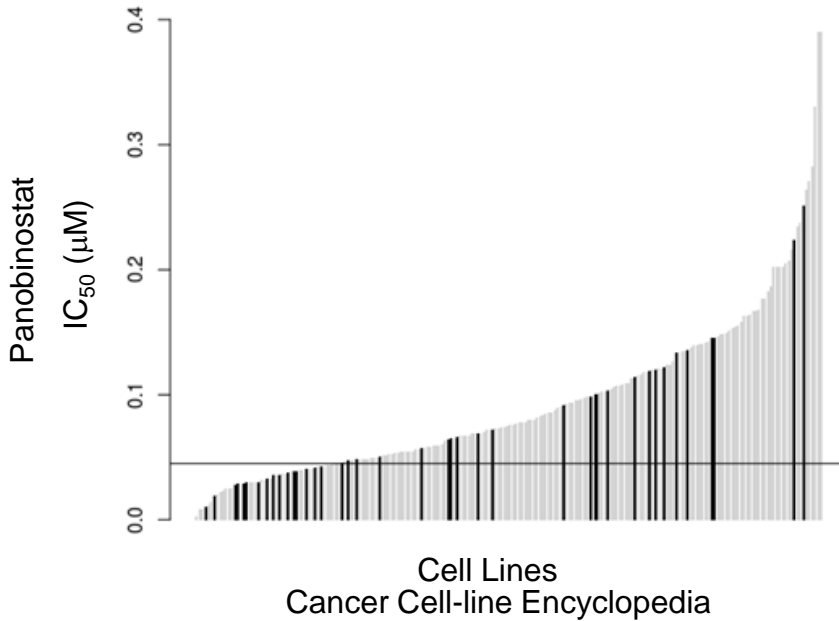

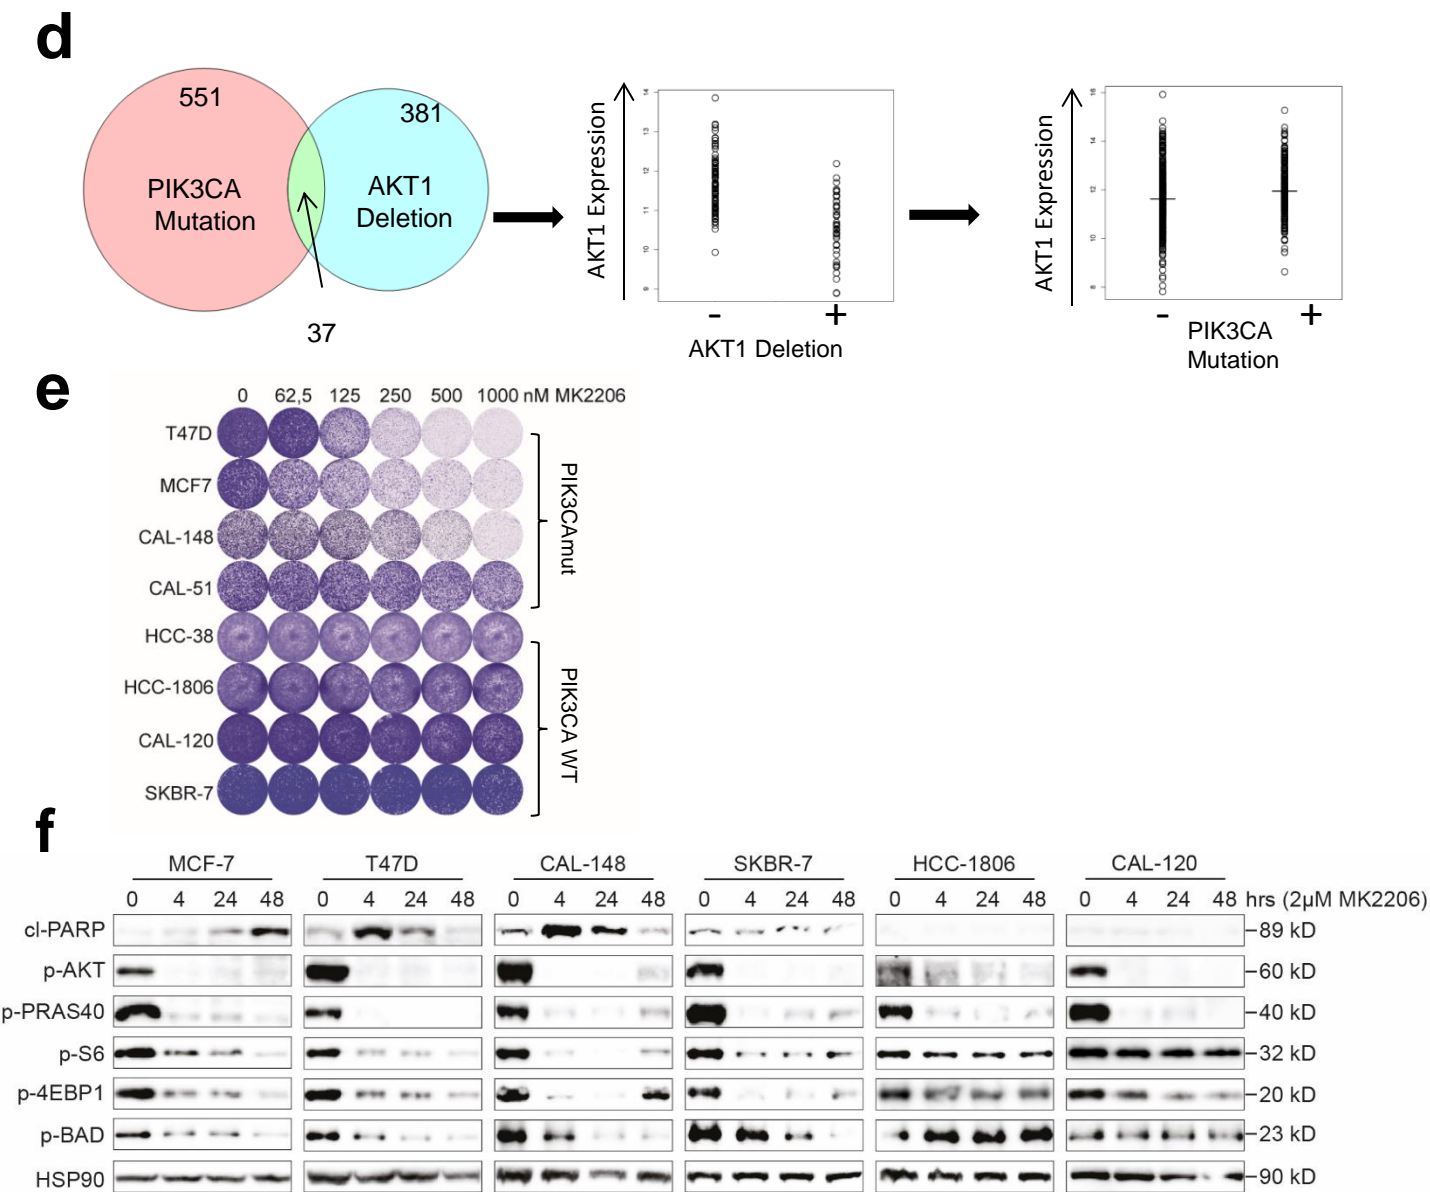

**Supplementary Figure 5. Validation of Predictive Biomarker Analysis using MiSL.** (a) Targets of Panobinostat (HDAC inhibitor) (upper panel) and MEK inhibitors AZD6244 and PD-0325901 (lower panel) as per DGidb data. (b) Summary of comparisons between MiSL-predicted sensitive cell lines and sensitive cell lines using pharmacologic data for a variety of targets. There is a statistically significant overlap between the predictions and sensitivity based on actual pharmacological data. (c) Plot showing  $IC_{50}$  values for all the CCLE cell lines (ranked in decreasing order of sensitivity) tested by Barrentina et. al. for Panobinostat (HDAC inhibitor). The horizontal line shows the  $IC_{50}$  threshold used to determine sensitivity to the drug – lower than threshold implies the cell line is sensitive. The MiSL-predicted sensitive cell lines are marked in black. (d) MiSL analysis steps illustrated for *AKT1* – (i) mutual exclusion of *PIK3CA* mutation and gene deletion across cancers (HI-LO Boolean implication), (ii) deletion of gene concordant with lower expression of gene ( $p < 0.05$ ), (iii) expression of gene is higher in *PIK3CA*-mutated breast cancer ( $p < 0.05$ ) (e) Breast cancer cells were seeded in the presence of increasing concentrations of MK-2206 with concentrations as indicated. All cells were fixed with 4% formaldehyde and stained with 0.1% crystal violet when wells containing untreated cells became confluent. (f) Western blot of cell extracts of *PIK3CA* mutant (MCF-7, T47D, CAL-148) and *PIK3CA* wild-type (SKBR-7, HCC-1806, CAL-120) breast cancer cells treated with 2 mM MK-2206 for 0, 4, 24 and 48 hours blotted with antibodies against cleaved-PARP, phospho-AKT, phospho-PRAS40, phospho-S6 kinase, phospho-4EBP1, phospho-BAD and HSP90.

**a**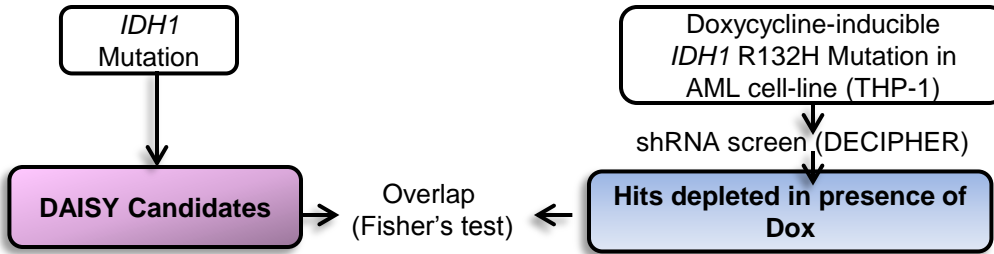**b*****IDH1* R132 mutation, AML**

|                  | shRNA Hits | shRNA Non-SL |
|------------------|------------|--------------|
| DAISY Candidates | 27         | 203          |
| Non-candidates   | 749        | 7200         |

p-value = 0.14

**c*****IDH1* R132 mutation, AML**

|                  | shRNA Hits | shRNA Non-SL |
|------------------|------------|--------------|
| DAISY Candidates | 12         | 218          |
| Non-candidates   | 427        | 7522         |

p-value = 0.58

**Supplementary Figure 6. DAISY Comparison with shRNA Data.** (a) Schematic for comparing DAISY candidates for *IDH1* mutation with synthetic lethal partners as per DECIPHER library screen generated using a doxycycline-inducible *IDH1* R132H THP-1 cells. (b) Contingency table showing overlap between DAISY candidates for *IDH1* mutation and shRNA synthetic lethals as per DECIPHER screen with drop-out ratio of 0.8 for 2 or more shRNAs for calling synthetic lethals in shRNA data. The overlap is not statistically significant. (c) Contingency table showing overlap between DAISY candidates for *IDH1* mutation and shRNA synthetic lethals as per DECIPHER screen with a more stringent criterion (drop-out ratio of 0.6 for 2 or more shRNAs) for calling synthetic lethals in shRNA data. The overlap is still not statistically significant with the more stringent criterion for calling synthetic lethals.

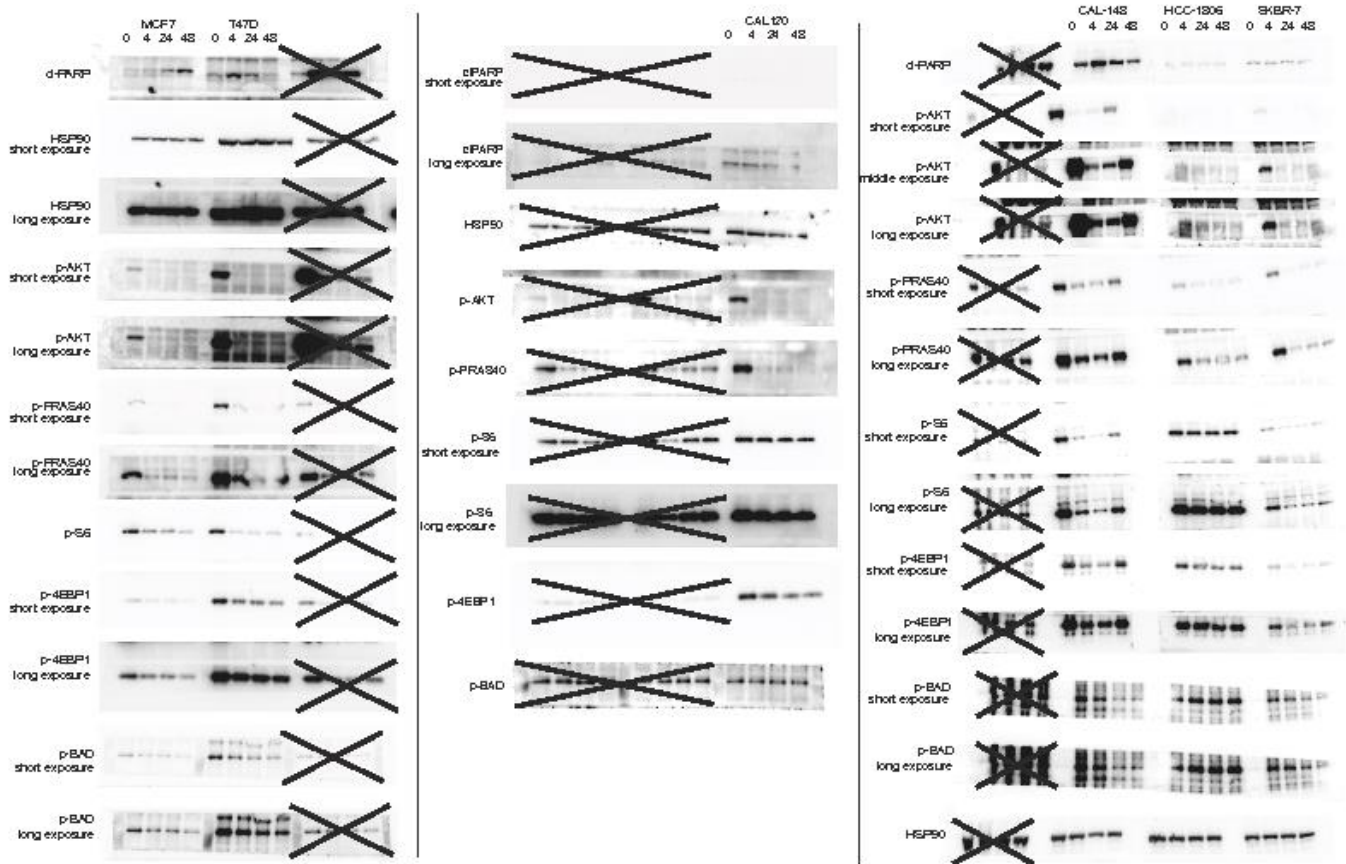

**Supplementary Figure 7** Uncropped images of Western blot of cell extracts of *PIK3CA* mutant (MCF-7, T47D, CAL-148) and *PIK3CA* wild-type (SKBR-7, HCC-1806, CAL-120) breast cancer cells treated with 2 mM MK-2206 for 0, 4, 24 and 48 hours blotted with antibodies against cleaved-PARP, phospho-AKT, phospho-PRAS40, phospho-S6 kinase, phospho-4EBP1, phospho-BAD and HSP90.
